# Supplementary material
Source: PubMed Central journal article supplement (PMC9545642)
Supplement: NPH-233-878-s001.pdf [file NPH-233-878-s001.pdf]

## New Phytologist Supporting Information

### Dissecting the labdane-related diterpenoid biosynthetic gene clusters in rice reveals directional cross-cluster phytotoxicity

Riqing Li, Juan Zhang, Zhaohu Li, Reuben J. Peters and Bing Yang

Article acceptance date: 12 October 2021

The following Supporting Information is available for this article:

#### Supporting Information Table S1 Primers for mutation detection in rice plants.

| Primer       | Sequence (5'-3')         | Usage                              |
|--------------|--------------------------|------------------------------------|
| F1           | TGCTTTTAGATCGATAAGAAC    | Mutation detection of c2BGC        |
| R1           | TGAGCAGGTTGCCGATGAGA     | Mutation detection of c2BGC        |
| F2           | ACCGCTGCATCCATAGCTCGC    | Mutation detection of c2BGC        |
| R2           | AGTTCCGGTTCCTATTCGAAC    | Mutation detection of c2BGC        |
| F3           | TTGAACCTAGCTAATGTGCTC    | Mutation detection of c4BGC        |
| R3           | TGCATGTTTCCAGATTCATCCTG  | Mutation detection of c4BGC        |
| F4           | GGCGGATTCTGCTTCGGCGAC    | Mutation detection of c4BGC        |
| R4           | GTGAACATATCCTGCACAATG    | Mutation detection of c4BGC        |
| gCYP76M7/8-F | GTGTGAGCTCCGACCCGAGTGGA  | CRISPR/Cas9 construct of CYP76M7/8 |
| gCYP76M7/8-R | AAACTCCACTGCGGGTCGGAGCTC | CRISPR/Cas9 construct of CYP76M7/8 |
| CYP76M7-F    | CTACGCCGCGGCAAACCCC      | Mutation detection of CYP76M7      |
| CYP76M7-R    | ACGAGGTTGAGGAGGCCAGT     | Mutation detection of CYP76M7      |
| CYP76M8-F    | TACTTGGTTCGGCGGCG        | Mutation detection of CYP76M8      |
| CYP76M8-R    | GGCTGACACCATGGCTCTT      | Mutation detection of CYP76M8      |

#### Supporting Information Table S2 Segregation of T2 populations of rice mutants

| Population         | Total No. | Individual NO. of a particular genotype |              |            | $\chi^2$ <sup>a</sup> |
|--------------------|-----------|-----------------------------------------|--------------|------------|-----------------------|
|                    |           | WT                                      | Heterozygous | homozygous |                       |
| $\Delta 2bgc$ (T2) | 99        | 25                                      | 51           | 23         | 0.17                  |
| $\Delta 4bgc$ (T2) | 107       | 27                                      | 54           | 26         | 0.03                  |

<sup>a</sup>  $\chi^2_{0.05} (1:2:1) = 5.99$ .

**Supporting Information Table S3** Primers for RT-PCR

| <b>Gene</b>    | <b>Kitaake rice gene ID <sup>a</sup></b> | <b>Forward primer (5'-3')</b> | <b>Reverse primer (5'-3')</b> |
|----------------|------------------------------------------|-------------------------------|-------------------------------|
| <i>OsCPS4</i>  | OsKitaake04g030200                       | ggttcttgcccaggagaatg          | gaccttgatgatgtggctat          |
| <i>CYP99A3</i> | OsKitaake04g030300                       | ccttagctcaacacacgtc           | gtggtcttggtggctctgt           |
| <i>OsMAS</i>   | OsKitaake04g030500                       | tgtcctgctcaacagcag            | gttgggaagagtgaatacatgc        |
| <i>OsKSL4</i>  | OsKitaake04g030600                       | gtggtcgtctccagaatgat          | gacaccgtcttcttaacaac          |
| <i>CYP99A2</i> | OsKitaake04g030800                       | gccctggtgatacatttgg           | gagccgtatatccatcagatt         |
| <i>CYP76M5</i> | OsKitaake02g214700                       | gtcgtgcctgtcatcgtcaa          | cctggaggaagtgtatgaag          |
| <i>CYP76M8</i> | OsKitaake02g214900                       | agactgccaatgtccttgct          | cctgtgtaggcttatacttgt         |
| <i>CYP76M7</i> | OsKitaake02g215000                       | cgtgtccgagaagttcaagt          | gtgccactgggtcccgtat           |
| <i>OsKSL7</i>  | OsKitaake02g215400                       | cacctgttctactaccagac          | gtcatccacattctgattacc         |
| <i>CYP71Z6</i> | OsKitaake02g215500                       | gtgcgtaacatccgtcctaa          | gtggtagcattacacactgg          |
| <i>CYP71Z7</i> | OsKitaake02g215600                       | cgtcctccaagacagcacat          | gctacacaaataggccagtc          |
| <i>OsCPS2</i>  | OsKitaake02g215700                       | agcagcagcaacgatgtcag          | gagccatgctgtagacaca           |
| <i>OsKSL5</i>  | OsKitaake02g215800                       | cgcaggaagctcttctggtt          | tcacagcgttcccaaaccag          |
| <i>OsKSL6</i>  | OsKitaake02g216000                       | tagagaagtgggacgacctat         | gattcggcgatatgatccac          |
| <i>CYP76M6</i> | OsKitaake02g216100                       | caaccaagaacgtacaccag          | ggatggtgaggtacaacaag          |
| <i>PR1</i>     | OsKitaake07g021300                       | cgtcttcatcacctgcaa            | tcagcgtacgatagtagta           |
| <i>PBZ</i>     | OsKitaake12g 174100                      | ctcaagatgatcgaggac            | tggacatttctgctgctc            |
| <i>POX22.3</i> | OsKitaake07g273000                       | acgacataaacgggccac            | aggtgctaagccatggct            |
| <i>Actin1</i>  | OsKitaake03g316400                       | ctcagcacattccagcagat          | acagataggccggtgaaaa           |

<sup>a</sup> Kitaake gene IDs are from JGI (Joint Genome Institute) website, [https://phytozome.jgi.doe.gov/pz/portal.html#!info?alias=Org\\_OsativaKitaake\\_er](https://phytozome.jgi.doe.gov/pz/portal.html#!info?alias=Org_OsativaKitaake_er)

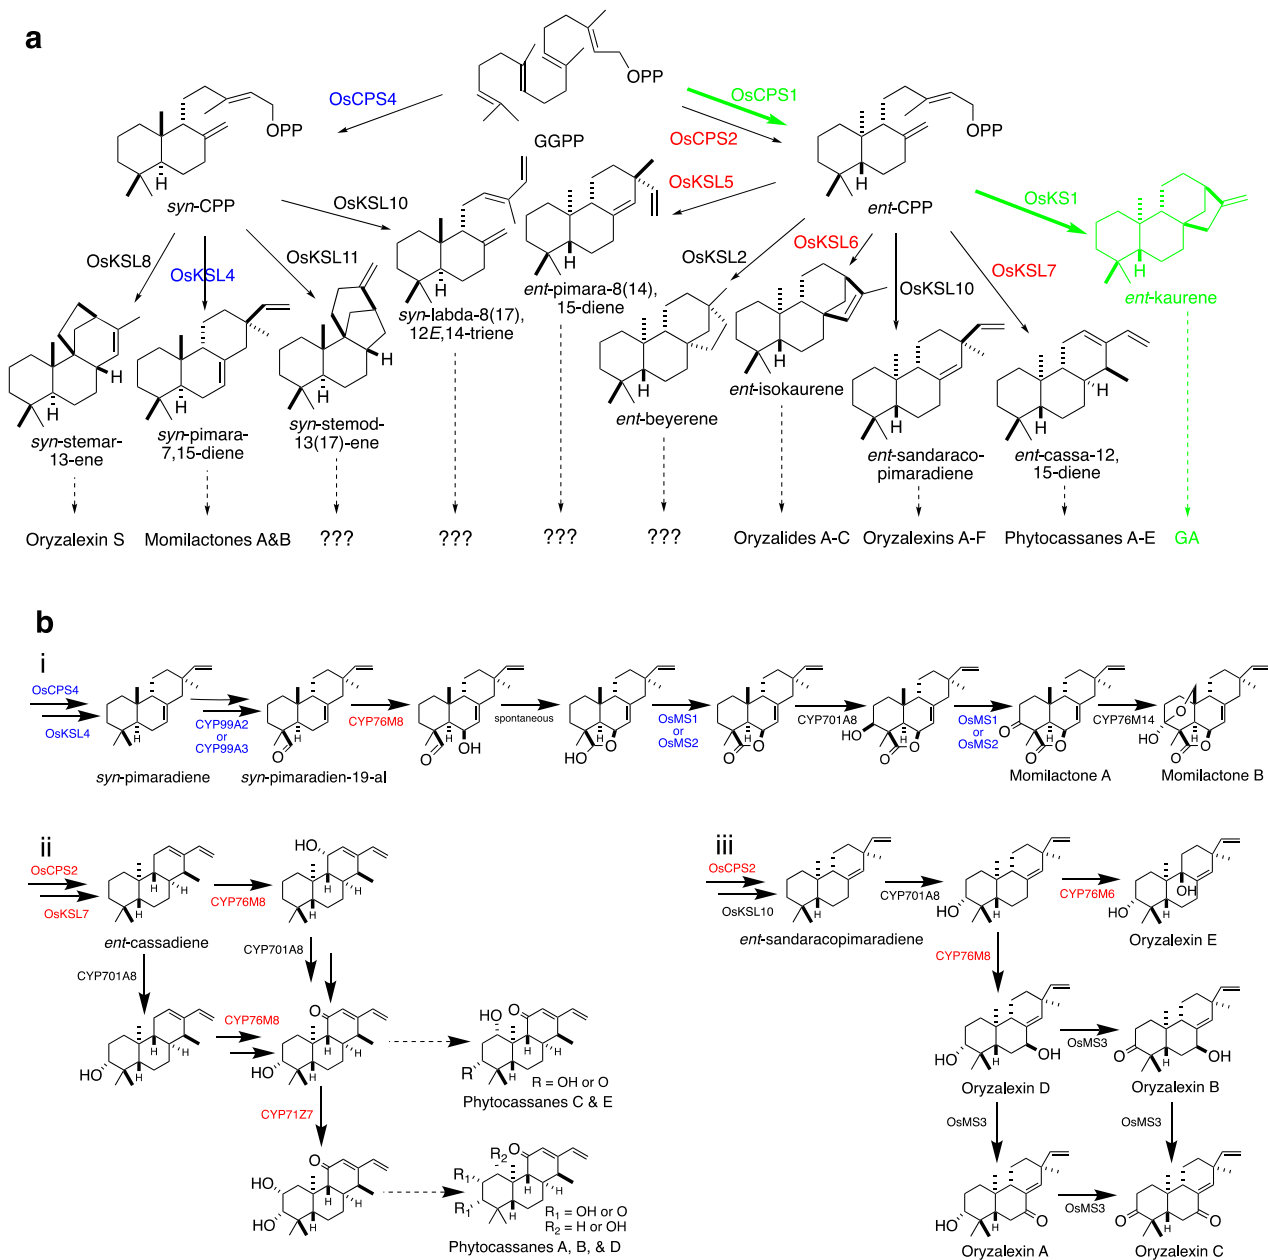

**Supporting Information Figure S1.** Rice LRD biosynthesis. Green indicates gibberellin biosynthesis, blue text the enzymes encoded in the c4BGC, and red text the enzymes encoded in the c2BGC. Dashed arrows indicate multiple reactions. **(a)** Map of known diterpene cyclases, with indicated LRDs where known (??? indicates unknown metabolic fates). **(b)** Downstream map of **(i)** momilactone, **(ii)** phytocassane and **(iii)** oryzalexin biosynthesis showing known relevant enzymes.

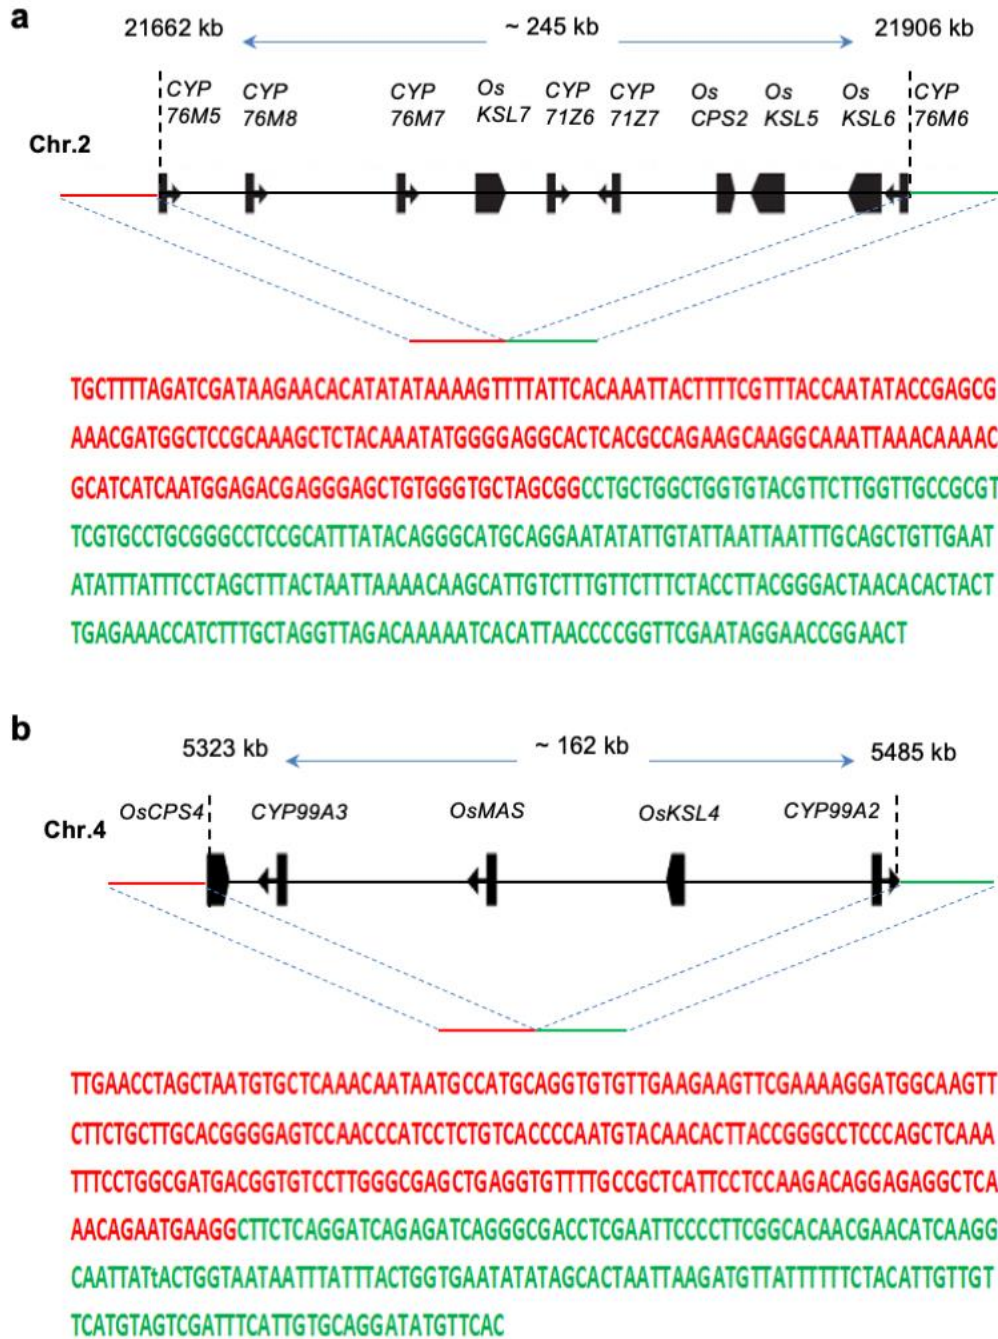

**Supporting Information Figure S2.** Genomic DNA sequence of  $\Delta c2bgc$  and  $\Delta c4bgc$  mutations in rice. (a,b) Top, schematic of large deletions one chromosome 2 (a) and 4 (b). Bottom, the flanking genomic DNA sequence of large deletions. Red and green color indicates genomic DNA sequences flanking the gene cluster deletions, respectively.

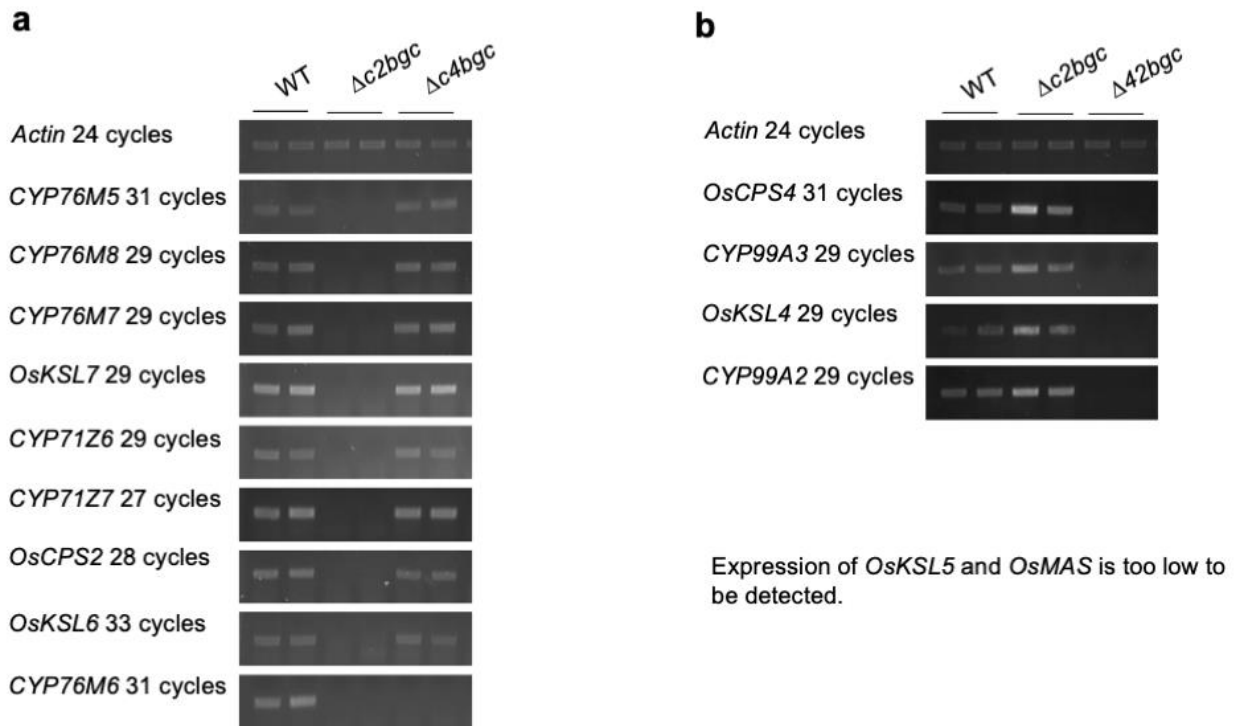

**Supporting Information Figure S3.** Relative expression level of enzymatic genes from c2GBC and c4GBC in rice plants. **(a)** Gel images of RT-PCR amplicons using gene-specific primers for nine genes in c2GBC on RNA transcripts from  $\Delta c2bgc$  and  $\Delta c4bgc$  plant leaves. **(b)** Gel images of RT-PCR amplicons using gene-specific primers for four genes in c4GBC on RNA transcripts from  $\Delta c2bgc$  and  $\Delta c4bgc$  plant leaves.

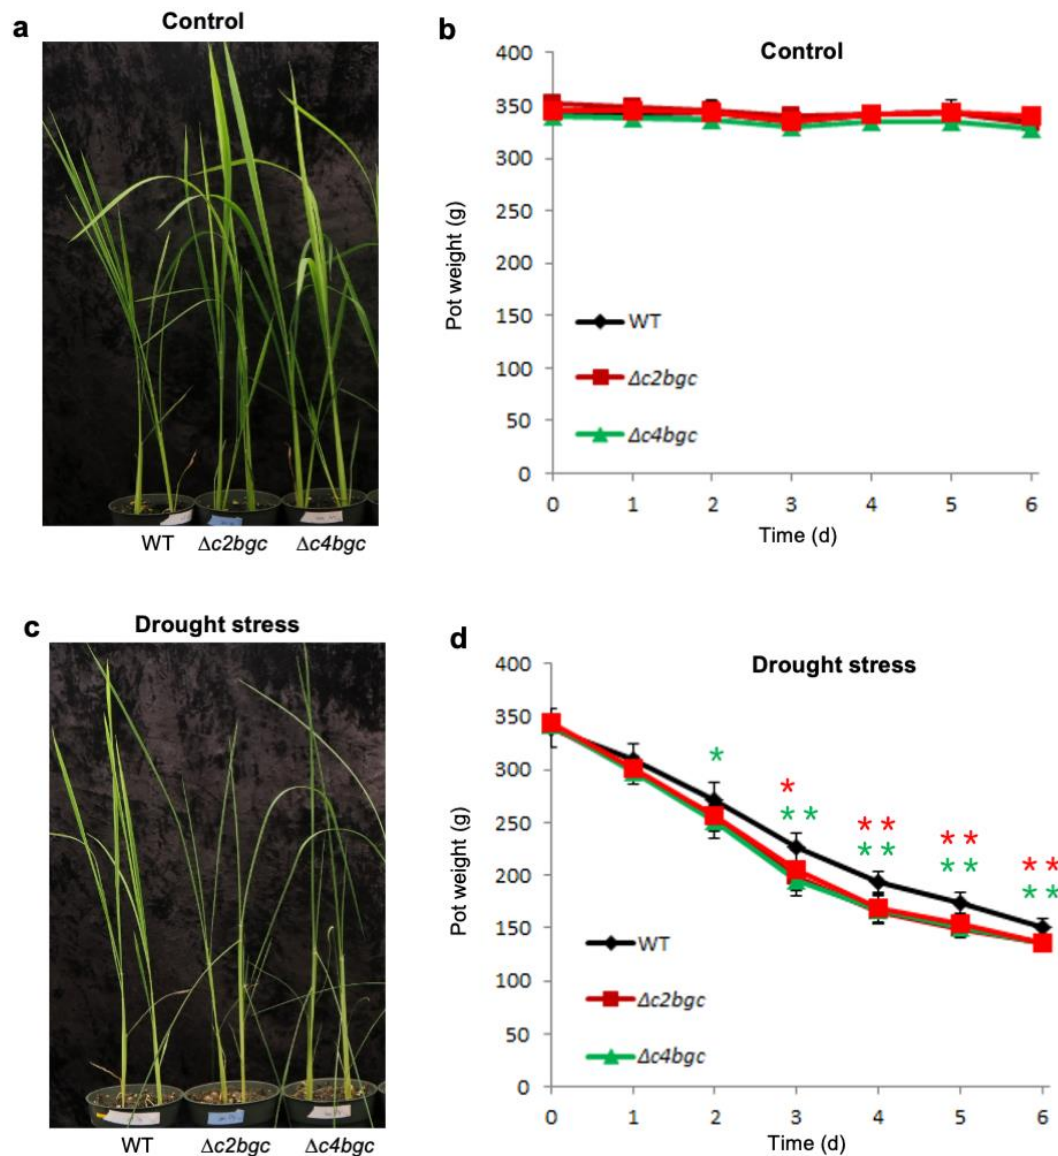

**Supporting Information Figure S4.** Effect of  $\Delta c2bgc$  and  $\Delta c4bgc$  mutants of rice on drought resistance. (a, c) Representative pictures of wild-type (WT),  $\Delta c2bgc$  and  $\Delta c4bgc$  mutant plants in normal condition (continued watering) (a) and analysis of water loss in normal condition (continued watering) (c). (b, d) Representative pictures of wild-type (WT),  $\Delta c2bgc$  and  $\Delta c4bgc$  mutant plants after drought stress treatment (withholding of water for 6 d) (b) and analysis of water loss during drought stress treatment (d) from pots with WT,  $\Delta c2bgc$  and  $\Delta c4bgc$  mutant plants (n = 6, error bars indicate SD). Asterisks represent significant differences derived from one-way ANOVA followed by Dunnett's multiple comparisons tests to compare the different lines against WT at each time point (\*,  $p < 0.05$  and \*\*,  $p < 0.01$ ; colors correlated to that for  $\Delta c2bgc$  and  $\Delta c4bgc$  mutant lines, respectively). Four independent experiments were performed with similar results. Error bars represent +/- SD.

#### CYP76M7 mutation site

|                     |                                                           |
|---------------------|-----------------------------------------------------------|
| WT                  | ATCCCGAGCTCCGACCCGCAGTGGAAAGGCCCTGCGCGGGATCCAGGG          |
| <i>cyp76m7/8</i> #1 | ATCCCGAGCTCCGACCCGCAG-GGAAGGCCCTGCGCGGGATCCAGGG           |
| <i>cyp76m7/8</i> #2 | ATCCCGAGCTCCGACCCGCAGT <b>T</b> GGAAGGCCCTGCGCGGGATCCAGGG |
| <i>cyp76m7/8</i> #3 | ATCCCGAGCTCCGACCCGCAGT <b>T</b> GGAAGGCCCTGCGCGGGATCCAGGG |

#### CYP76M8 mutation site

|                     |                                                             |
|---------------------|-------------------------------------------------------------|
| WT                  | CCCGAGCTCCGACCCGCAGTGGAAAGGCCCTGCGGGGGATCCACGCCTCG          |
| <i>cyp76m7/8</i> #1 | CCCGAGCTCCGACC-----TGGAAGGCCCTGCGGGGGATCCACGCCTCG           |
| <i>cyp76m7/8</i> #2 | CCCGAGCTCCGACCCGCAGT <b>T</b> GGAAGGCCCTGCGGGGGATCCACGCCTCG |
| <i>cyp76m7/8</i> #3 | CCCGAGCTCCGACCCGCAGT <b>T</b> GGAAGGCCCTGCGGGGGATCCACGCCTCG |

**Supporting Information Figure S5.** Mutations of *CYP76M7* and *CYP76M8* genes in *cyp76m7/8* double mutant lines. The *CYP76M7* and *CYP76M8* genes were mutated simultaneously using CRISPR/Cas9 approach in rice. "-" and letters in red color represent deletion and insertion mutations, respectively.

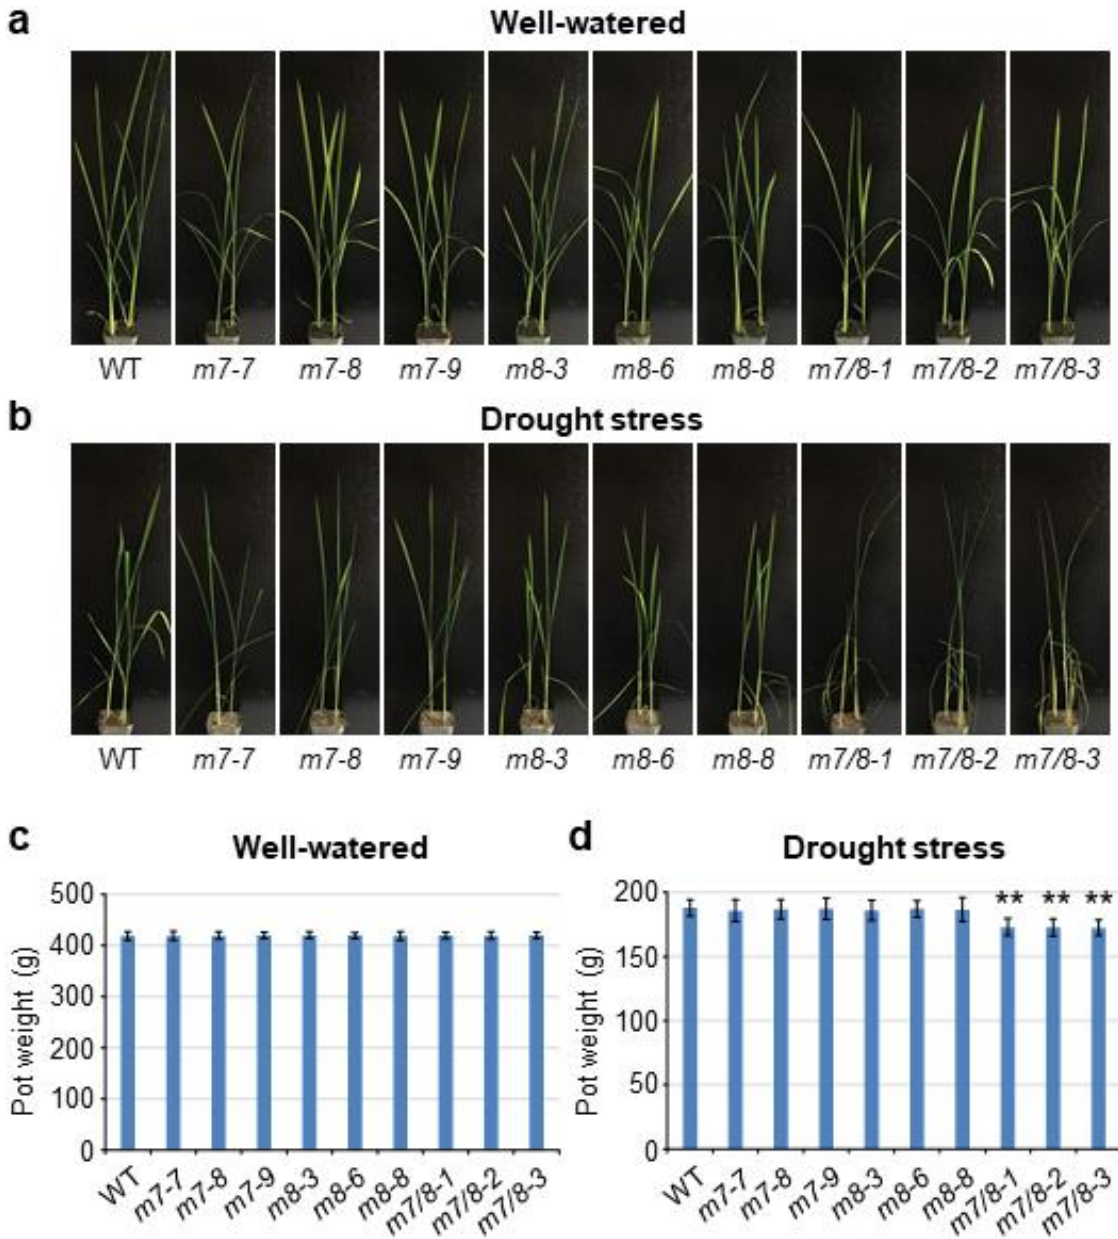

**Supporting Information Figure S6.** Effect of *cyp76m7*, *cyp76m8* and *cyp76m7/8* mutants on drought resistance in rice plants. **(a, c)** Representative pictures of wild-type (WT), *cyp76m7*, *cyp76m8* and *cyp76m7/8* mutant plants under normal condition (continued watering) (a), and analysis of water loss under normal condition (continued watering) (c) (n = 5, error bars indicate SD). **(b, d)** Representative pictures of wild-type (WT), *cyp76m7*, *cyp76m8* and *cyp76m7/8* mutant plants after drought stress treatment (withholding of water for 7 d) (b), and analysis of water loss after drought stress treatment (d) (n = 5, error bars indicate SD). Asterisks represent significant differences derived from one-way ANOVA followed by Dunnett's multiple comparisons tests to compare the different lines against WT (\*\*,  $p < 0.01$ ). Error bars represent +/- SD.
